# Supplementary material
Source: PubMed Central journal article supplement (PMC1885573)

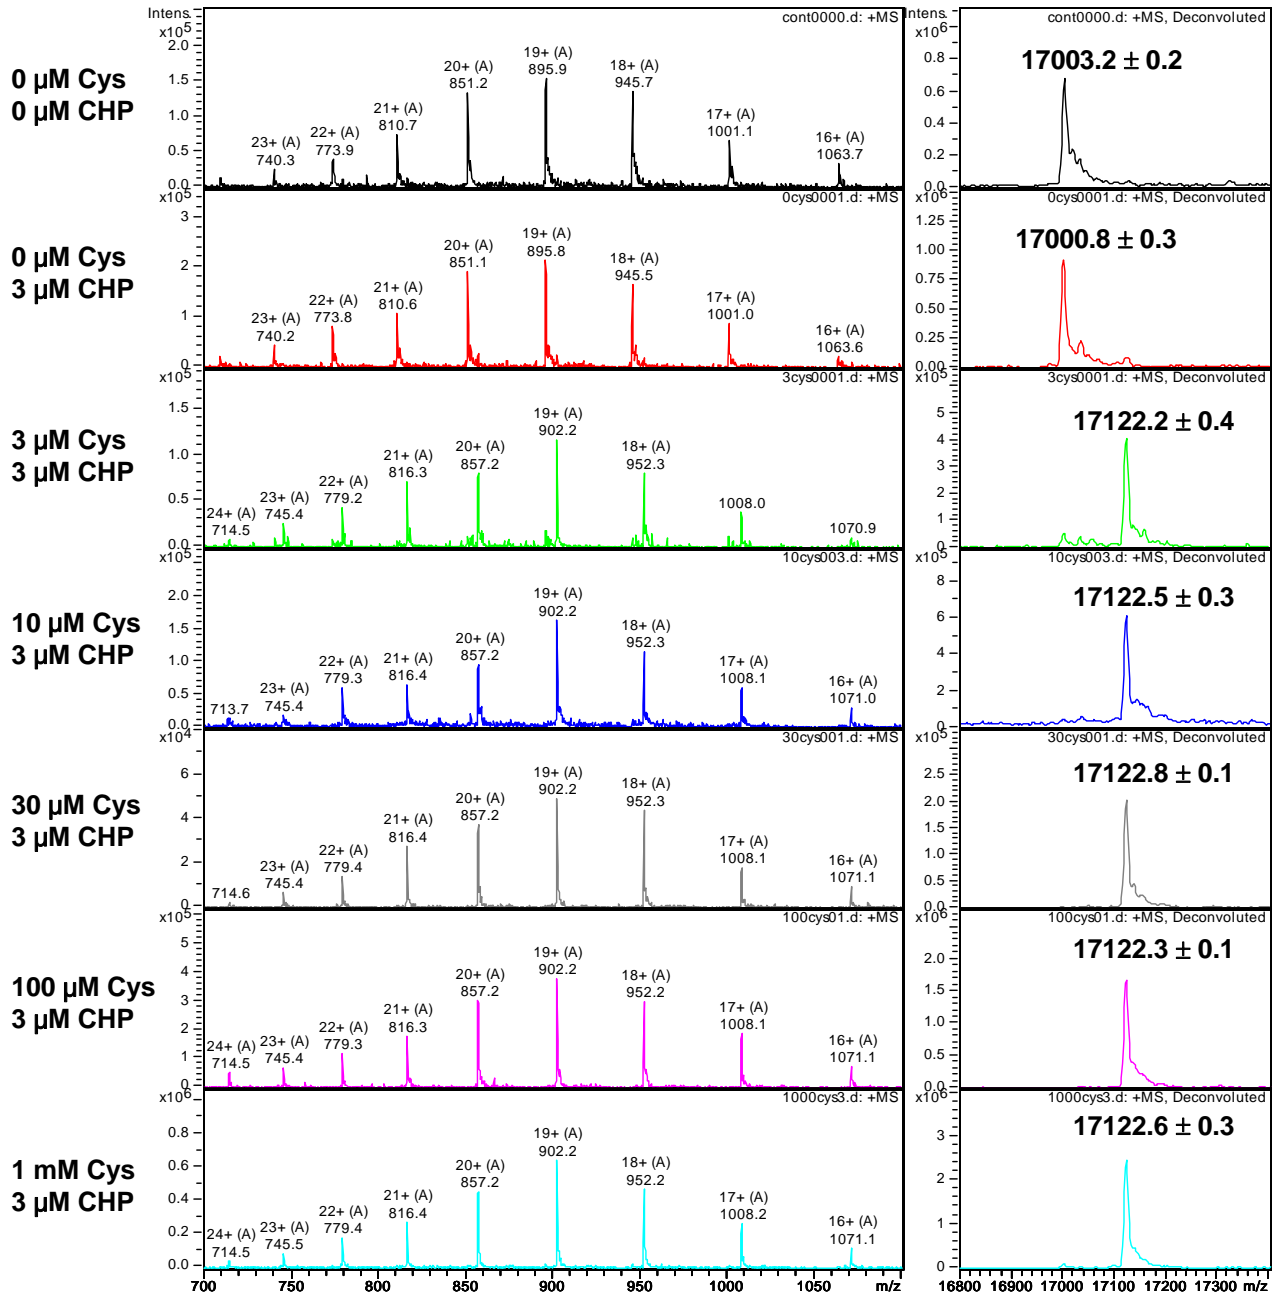

Supplement: pnas_0702081104_1.pdf [file pnas_0702081104_1.pdf]

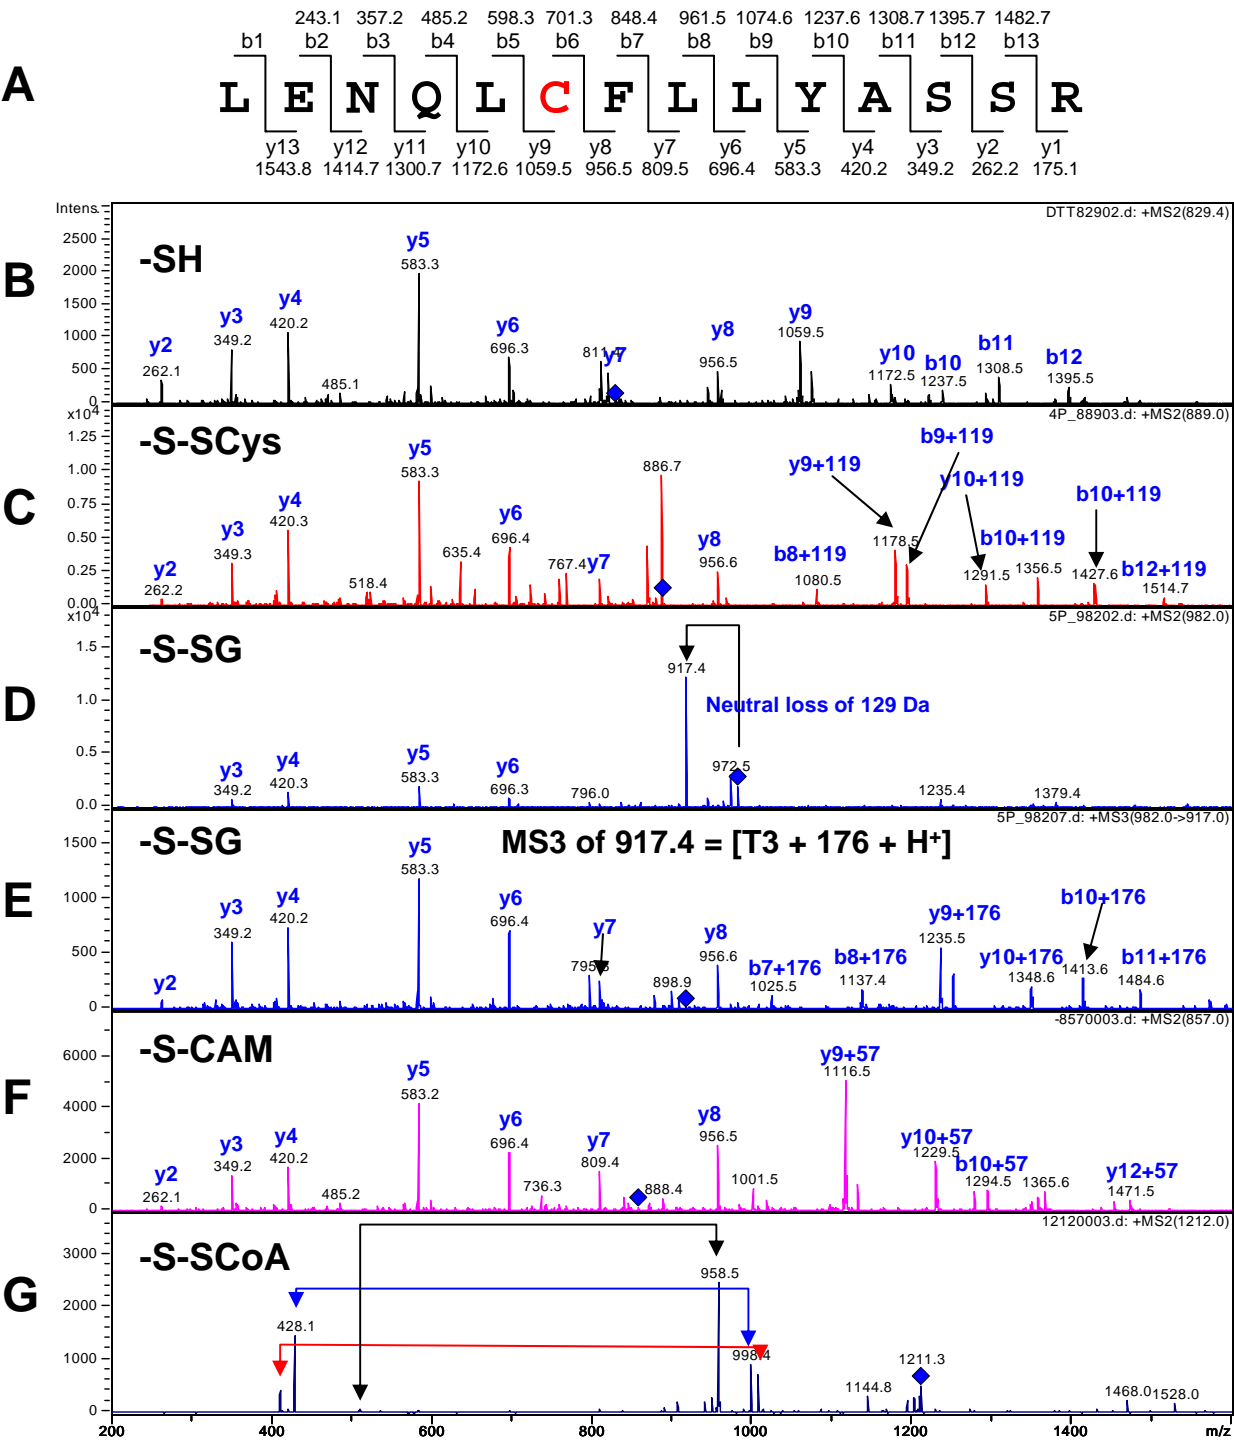

Supplement: pnas_0702081104_2.pdf [file pnas_0702081104_2.pdf]

**A**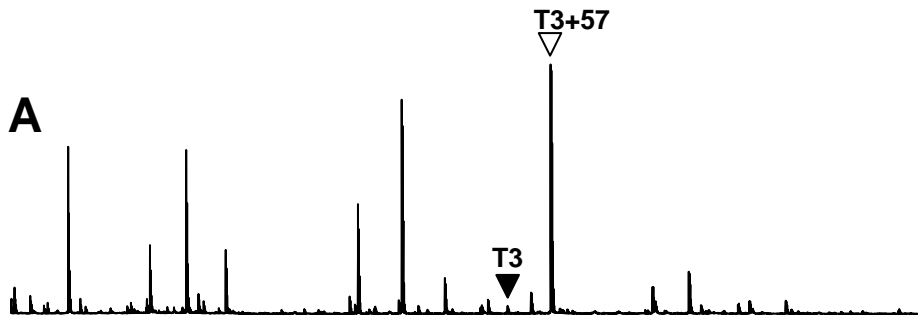**B**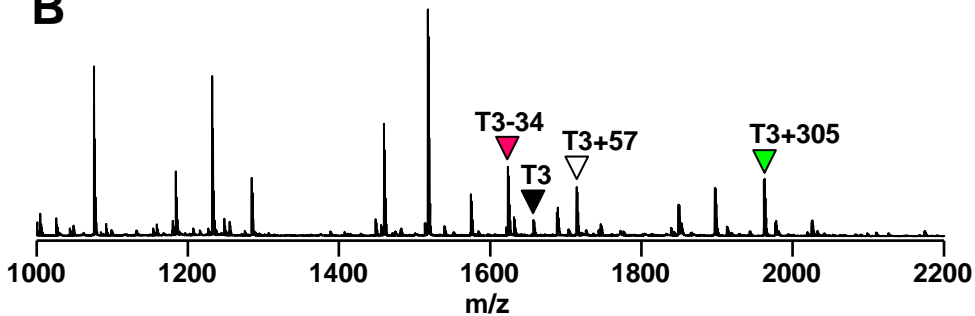

Supplement: pnas_0702081104_3.pdf [file pnas_0702081104_3.pdf]

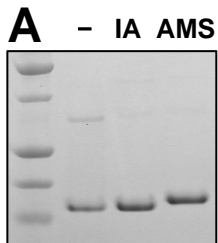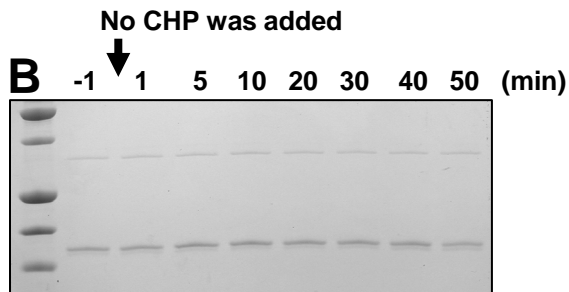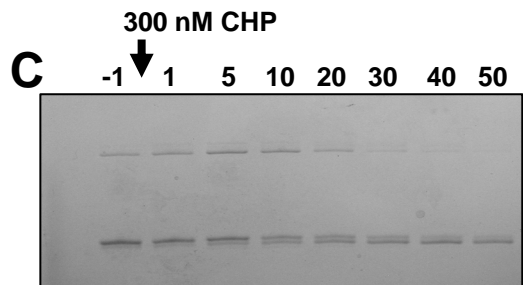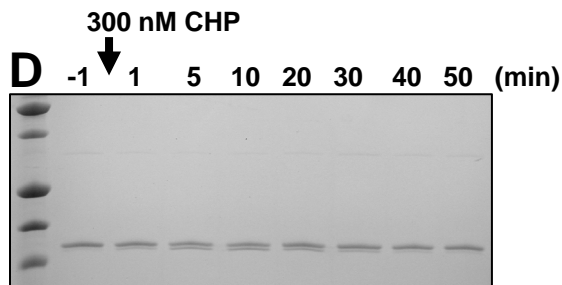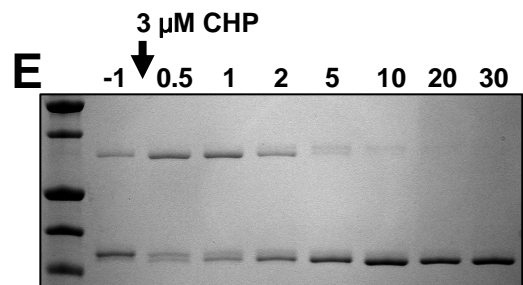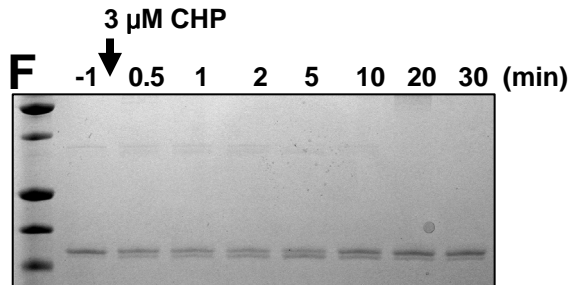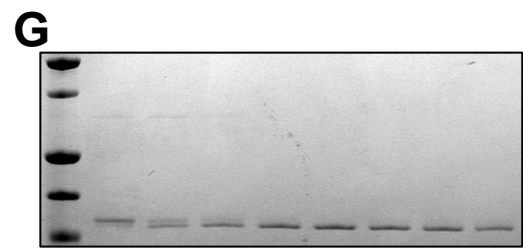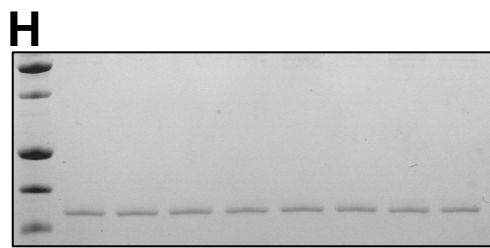

Supplement: pnas_0702081104_4.pdf [file pnas_0702081104_4.pdf]

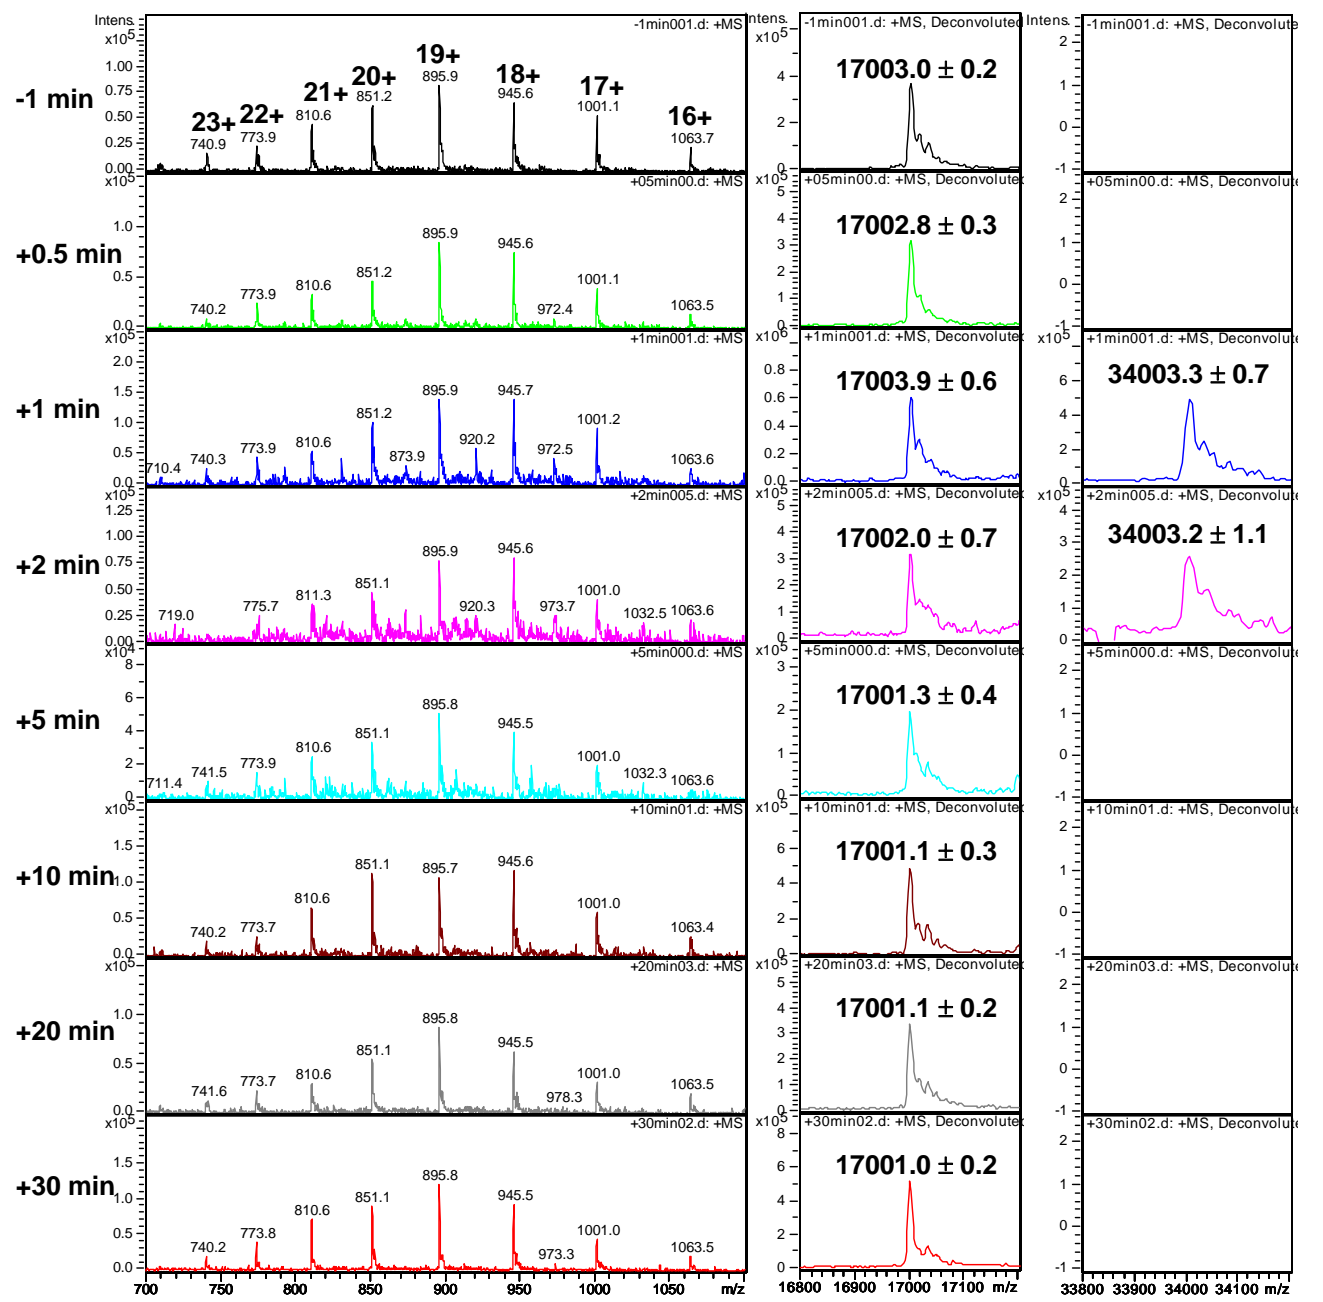

Supplement: pnas_0702081104_5.pdf [file pnas_0702081104_5.pdf]

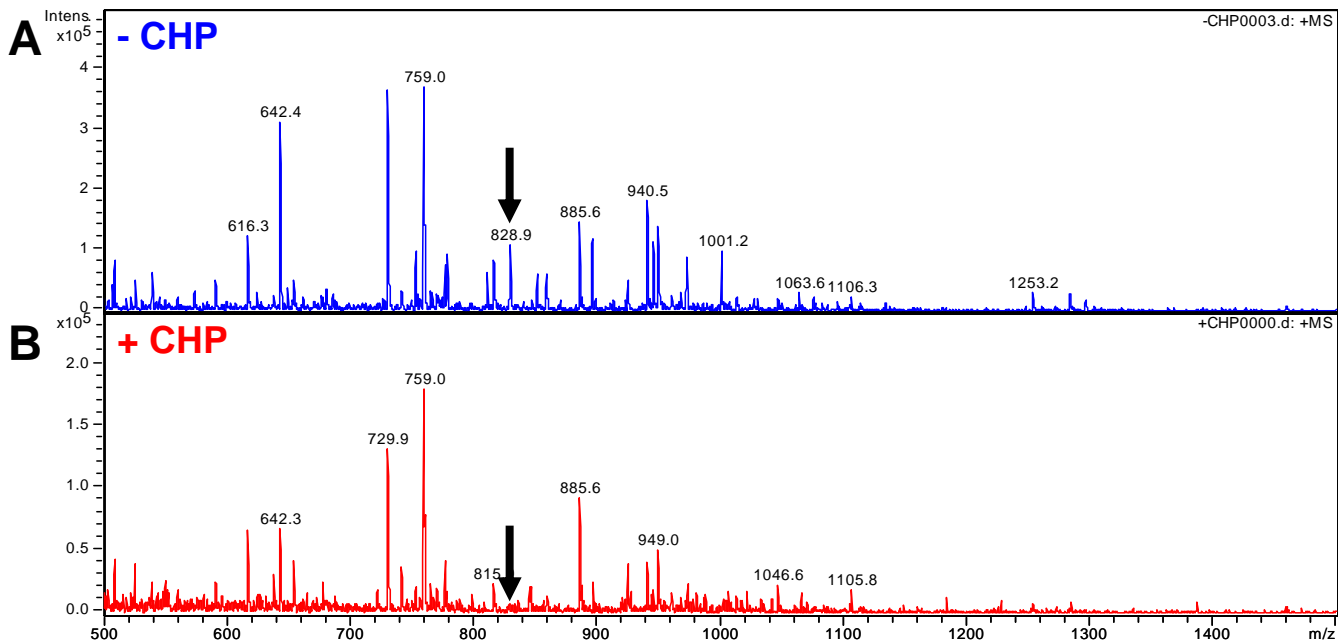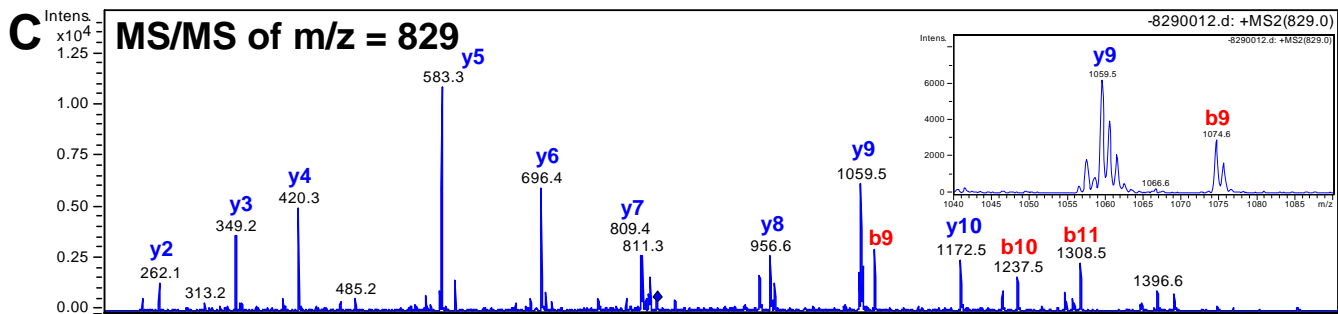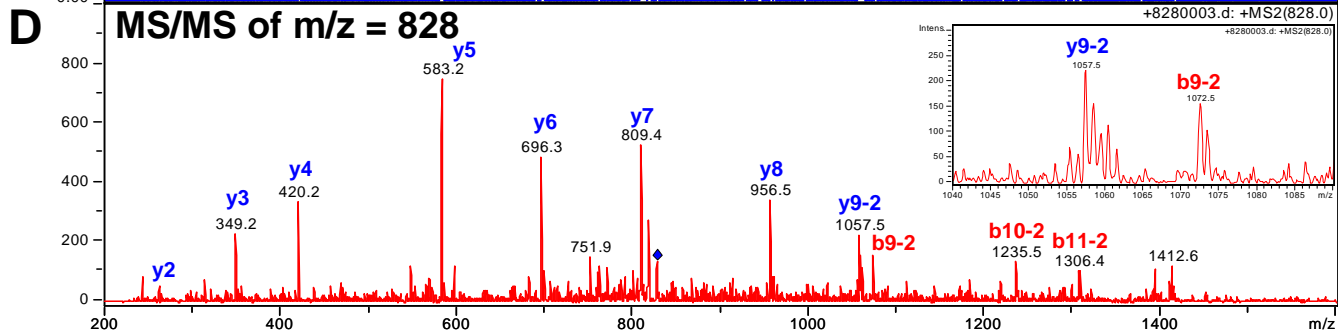

Supplement: pnas_0702081104_6.pdf [file pnas_0702081104_6.pdf]

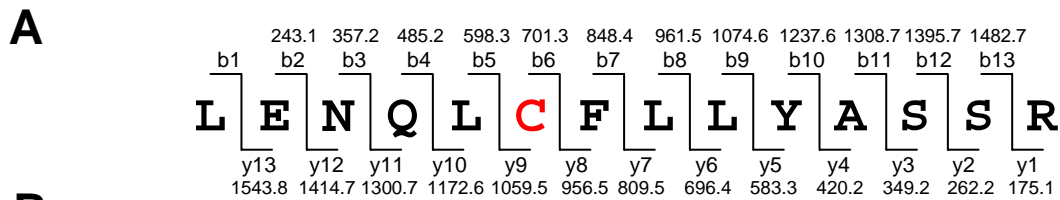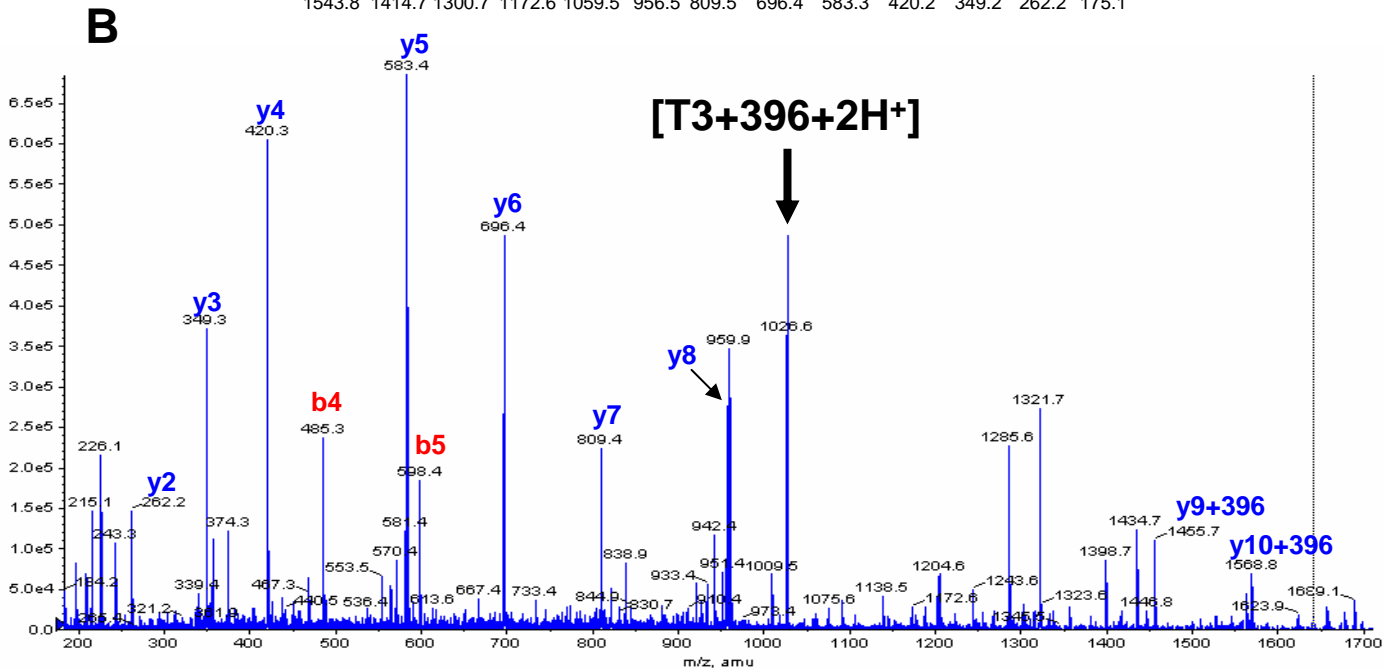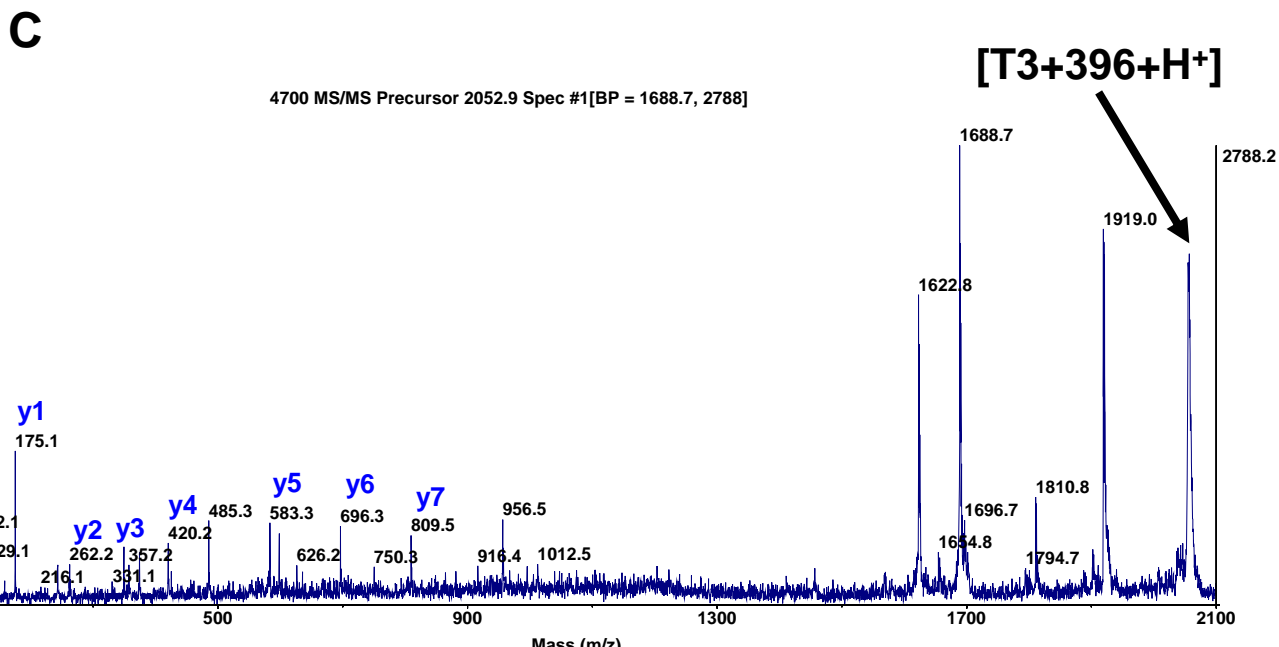

Supplement: pnas_0702081104_7.pdf [file pnas_0702081104_7.pdf]

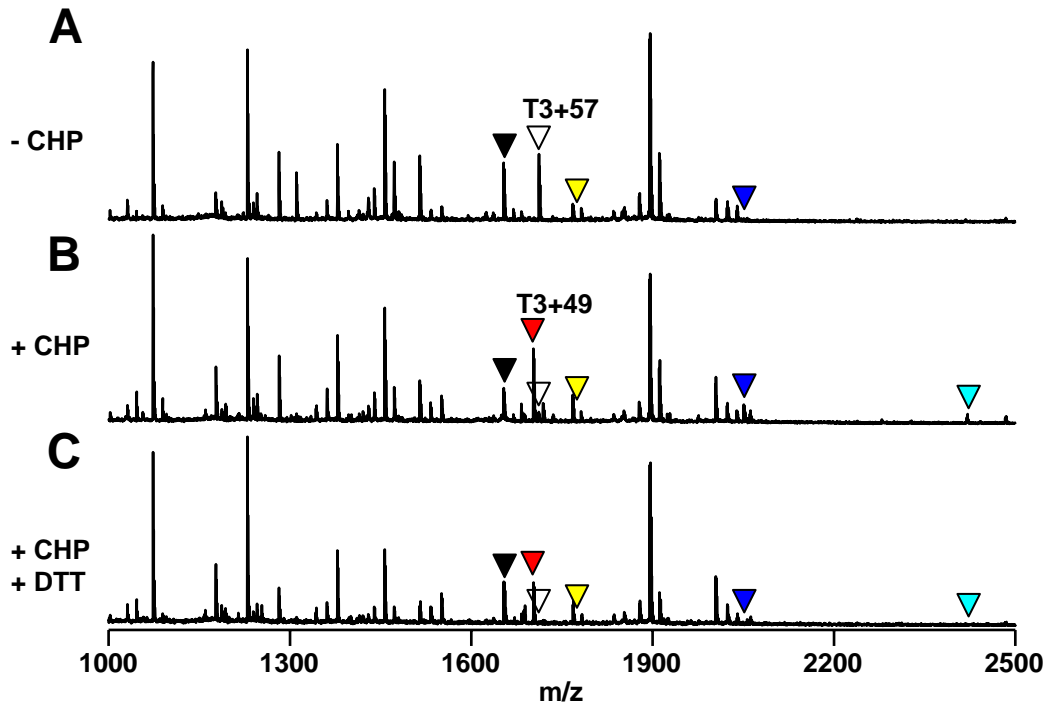

Supplement: pnas_0702081104_8.pdf [file pnas_0702081104_8.pdf]
